# Supplementary material
Source: ML conference proceedings conference paper supplement (https://openreview.net/forum?id=XtXa6hoNrU)
Supplement: supplementary_material [file attachment]

# DFROT: ACHIEVING OUTLIER-FREE AND MASSIVE ACTIVATION-FREE FOR ROTATED LLMs WITH REFINED ROTATION

**Anonymous authors**

Paper under double-blind review

## ABSTRACT

Rotating the activation and weight matrices to reduce the influence of outliers in large language models (LLMs) has recently attracted significant attention, particularly in the context of model quantization. Prior studies have shown that in low-precision quantization scenarios, such as 4-bit weights and 4-bit activations (W4A4), randomized Hadamard transforms can achieve significantly higher accuracy than randomized orthogonal transforms. Notably, the reason behind this phenomena remains unknown. In this paper, we find that these transformations show substantial improvement in eliminating outliers for common tokens and achieve similar quantization error. The primary reason for the accuracy difference lies in the fact that randomized Hadamard transforms can slightly reduce the quantization error for tokens with massive activations while randomized orthogonal transforms increase the quantization error. Due to the extreme rarity of these tokens and their critical impact on model accuracy, we consider this a long-tail optimization problem, and therefore construct a simple yet effective method: a weighted loss function. Additionally, we propose an optimization strategy for the rotation matrix that involves alternating optimization of quantization parameters while employing orthogonal Procrustes transforms to refine the rotation matrix. This makes the distribution of the rotated activation values more conducive to quantization, especially for tokens with massive activations. Our method enhances the Rotated LLMs by achieving dual free, *Outlier-Free* and *Massive Activation-Free*, dubbed as DFROT. Extensive experiments demonstrate the effectiveness and efficiency of DFROT. By tuning the rotation matrix using just a single sample, DFROT achieves a perplexity improvement of 0.25 and 0.21 on W4A4KV4 and W4A4KV16, respectively, for LLaMA3-8B, a model known for its quantization challenges. Code is anonymously available at <https://anonymous.4open.science/r/DFROT-8FE3>.

## 1 INTRODUCTION

Large Language Models (LLMs) have shown exceptional abilities across numerous domains. Cutting-edge open-source models like LLaMA (Touvron et al., 2023) and Mistral (Jiang et al., 2023), along with proprietary LLMs such as GPT (Achiam et al., 2023) and Gemini (Team et al., 2023), are now being applied in a wide range of applications, including natural language understanding (Zellers et al., 2019; Hendrycks et al., 2020), machine translation (Zhang et al., 2023), content generation (Mo et al., 2024), and recommendation systems (Wu et al., 2023).

However, the remarkable success of LLMs is largely reliant on significant computational resources. LLMs often consist of billions of parameters, making them not only resource-intensive to train but also challenging to deploy on devices with limited computational capacity, such as mobile phones and edge devices. Additionally, the high memory and processing demands not only drive up hardware costs but also significantly increase energy consumption, leading to serious deployment concerns. To address these challenges, researchers and engineers are actively exploring various model compression techniques (Frantar et al., 2022; Xiao et al., 2023; Lin et al., 2024a; Yao et al., 2022; Frantar & Alistarh, 2023; Ashkboos et al., 2024a). These techniques aim to reduce the size of LLMs while maintaining their performance as effectively as possible, achieving a balance between

054 efficiency and accuracy. Among the various methods, Post-Training Quantization (PTQ) provides a  
 055 training-free approach, or one with minimal training cost for calibration purposes Nagel et al. (2019);  
 056 Li et al. (2021), allowing for rapid and efficient quantization. Compared to Quantization-Aware  
 057 Training (QAT), which requires multiple rounds of fine-tuning, PTQ incurs significantly lower com-  
 058 putational costs. This makes it an appealing option for quantizing LLMs.

059 Unfortunately, the presence of outliers in the activations (Dettmers et al., 2022; Zeng et al., 2022)  
 060 often leads to a significant reduction in model accuracy when PTQ is applied directly. To address  
 061 this problem, earlier approaches have either scaled weights and activations (Xiao et al., 2023; Wei  
 062 et al., 2023; Shao et al., 2023), shifting the quantization challenges from activations to weights, or  
 063 employed mixed-precision techniques to isolate outliers (Dettmers et al., 2022), thereby minimizing  
 064 the LLM’s quantization error.

065 Recent research (Ashkboos et al., 2024b) has demonstrated that rotating activations in LLMs can ef-  
 066 fectively eliminate most outliers while preserving computational invariance, ensuring that the LLM’s  
 067 output remains identical to its original results. Moreover, the rotation matrices can be merged into  
 068 the weights, imposing no additional burden on network inference. This innovative computational  
 069 invariance (Ashkboos et al., 2024a) has garnered significant attention from researchers.

070 Although rotation is widely recognized as an important method for the quantization of LLMs, there  
 071 remain many unresolved issues. For example, as shown in Table 1, when activations are reduced to 4  
 072 bits, the reasons why randomized Hadamard transforms (RH) often achieve significant improvement  
 073 compared to randomized orthogonal transforms (RO) (Ashkboos et al., 2024b; Liu et al., 2024) have  
 074 not yet been fully understood. However, while directly training rotation matrices can yield good  
 075 results (Liu et al., 2024), the training process will cause substantial computational resources and  
 076 adds complexity to the quantization process.

077 In this paper, we first investigate the underlying reasons why RH outperforms RO. We find that for  
 078 ordinary tokens consisting primarily of outliers (Achiam et al., 2023), both RO and RH transfor-  
 079 mations can equally reduce quantization error when applied to these tokens. In contrast, for special  
 080 tokens with *massive activations* (Sun et al., 2024), using RO on these activations surprisingly leads  
 081 to an increase in quantization error. Our experiments show that this inability to efficiently manage  
 082 massive activations greatly restricts the accuracy of quantized LLMs. On the other hand, while  
 083 RH performs better than RO, it only manages to maintain or slightly reduce the quantization error  
 084 for these large activations. This observation indicates that both transformation methods struggle to  
 085 effectively manage massive activations in LLM quantization.

086 Building on these insights, we propose a novel optimization method to enhance the performance of  
 087 quantized LLMs, achieving both *Outlier-Free* and *Massive Activation-Free*, e.g. dual free (DFRot).  
 088 By treating scarce tokens with massive activations as long-tail distributed data, we develop a simple  
 089 yet effective weighted loss function. Additionally, we introduce an alternating optimization ap-  
 090 proach to refine the rotation matrices and quantization parameters, further minimizing quantization  
 091 error. Extensive experiments demonstrate the effectiveness of our proposed method. Specifically,  
 092 by tuning the rotation matrix with just a single sample and additional 8 minutes, DFRot achieves  
 093 a PPL improvement of 0.25 and 0.21 on W4A4KV4 and W4A4KV16 for LLaMA3-8B, a model  
 094 recognized for its quantization challenges (Huang et al., 2024).

## 095 2 RELATED WORK

096  
 097 Reducing quantization error is essential for model quantization. However, as reported by  
 098 LLM.int8() (Dettmers et al., 2022), simply quantizing LLM to INT8 results in significant accuracy  
 099 degradation due to the presence of outliers. To handle emerging outliers, LLM.int8() introduces a  
 100 mixed-precision decomposition scheme. Although it can preserve the model’s accuracy, the com-  
 101 plexity of fine-grained decomposition always leads to computational overhead and potential perfor-  
 102 mance bottlenecks. Currently, research in LLM quantization predominantly focuses on eliminating  
 103 outliers through scale invariance and rotation invariance.

### 104 2.1 ELIMINATING OUTLIERS VIA SCALE INVARIANCE

105  
 106 The initial idea behind suppressing outliers through scale invariance stems from the observation that  
 107 weights are easier to quantize than activations, and outliers in activations often appear in a few fixed

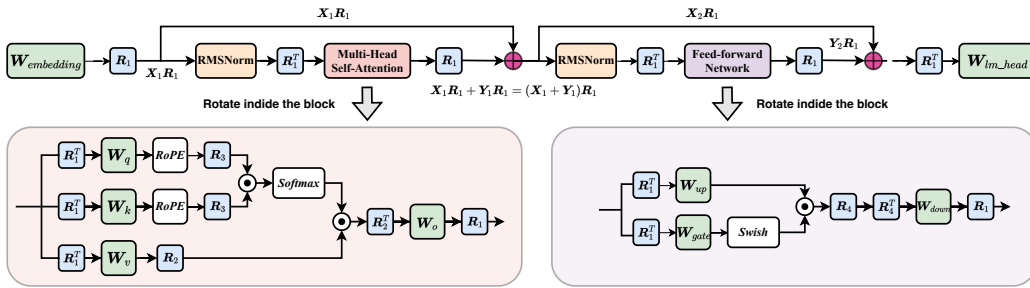

Figure 1: An illustration of rotational invariance in the LLaMA architecture. The rotation matrix  $R_1$  can be integrated into the residual connection, ensuring the network retains rotational invariance. The rotation inner the block can further reducing outliers in the block. Both of them make LLM fewer outliers and be easier to quantize. The rotation matrix  $R_1, R_1^T, R_2, R_2^T$  and  $R_4$  can be integrated with the adjunct weights.  $R_3$  and  $R_4$  need to compute online.

channels Dettmers et al., 2022. Based on this, SmoothQuant (Xiao et al., 2023) first proposes that we can offline migrate the quantization difficulty from activations to weights via scale invariance. SmoothQuant enables an INT8 quantization of both weights and activations for all the matrix multiplications in LLMs. Furthermore, Outlier Suppression+ (Wei et al., 2023) proposes a fast and stable scheme to effectively calculate scaling values, achieving a better balance in quantization burden. To reduce manual design and further enhance quantization performance in extremely low-bit quantization, OmniQuant (Shao et al., 2023) introduces Learnable Weight Clipping and Learnable Equivalent Transformation, efficiently optimizing the quantization process for both weight-only and weight-activation quantization. In the clipping W4A8 quantization, QQQ (Zhang et al., 2024) proposes to dynamically handle outliers through adaptive smoothing. QServe (Lin et al., 2024b) proposes SmoothAttention to effectively mitigate the accuracy degradation caused by 4-bit KV quantization. Both QQQ and QServe have effectively enhanced the performance of LLMs in W4A8 quantization.

## 2.2 ELIMINATING OUTLIERS VIA ROTATION INVARIANCE

Although scale invariance can reduce outliers and improve quantization performance, it merely transfers the outliers from activations to weights and has not eliminated them fundamentally. When the magnitude of the outliers is large, scaling struggles to achieve an effective balance between weights and activations. Recently, researchers have found that applying rotation matrices to networks can effectively reduce outliers without increasing the complexity of LLMs. QuIP Chee et al. (2024) is the first to suggest that quantization can benefit from the incoherence between weight and Hessian matrices. It employed randomized orthogonal matrices generated by Kronecker product to enhance their incoherence. QuIP# (Tseng et al., 2024) replaces the randomized orthogonal matrices with randomized Hadamard matrices, which are faster and possess better theoretical properties. QuaRot (Ashkboos et al., 2024b) is the first work to apply rotational invariance (Ashkboos et al., 2024a) for model quantization. QuaRot finds that randomized Hadamard transformations yield better results compared to randomized orthogonal transformations. SpinQuant (Liu et al., 2024) further extends the rotation matrices to a trainable space and applied Cayley optimization (Li et al., 2020) to refine them, achieving significant improvements across diverse datasets.

## 3 METHODOLOGY

### 3.1 PRELIMINARY

To remove outliers in the input activations  $X_1$ , a rotation matrix  $R_1$  is applied to the input matrix  $X^1$ , resulting in a new input activation  $X_1 R_1$ .  $R_1$  satisfies  $R_1 R_1^T = R_1^T R_1 = I$  and  $|R_1| = 1$ . Using the LLaMA architecture as an example,  $X_1 R_1$  is then passed to the RMSNorm, which satisfies the commutation property:  $RMSNorm(X_1 R_1) = RMSNorm(X_1) R_1$  (Ashkboos et al., 2024a). Here, we assume that RMSNorm operates on each row  $i$  of the activations  $X_1$  as  $X_{1,i} \leftarrow X_{1,i} / |X_{1,i}|$ . This commutation property implies that multiplying the input of RMSNorm by  $R_1$  is equivalent to multiplying the RMSNorm output by  $R_1$  as well.

Table 1: WikiText-2 perplexity ( $\downarrow$ ) results for RO and RH for LLaMA and Mistral models. The 4-4-4, 4-4-16, 4-8-16 represent W4A4KV4, W4A4KV16, W4A8KV16 respectively. We show the failed GPTQ using NaN and the perplexity results  $>100$  by Inf. QuaRot.FP16() denotes retaining tokens with massive activations as FP16.

| Method             | LLaMA2-7B   |             |        | LLaMA2-13B  |             |        | LLaMA3-8B   |             |        | Mistral-7B-v0.3 |             |        |
|--------------------|-------------|-------------|--------|-------------|-------------|--------|-------------|-------------|--------|-----------------|-------------|--------|
|                    | 4-4-4       | 4-4-16      | 4-8-16 | 4-4-4       | 4-4-16      | 4-8-16 | 4-4-4       | 4-4-16      | 4-8-16 | 4-4-4           | 4-4-16      | 4-8-16 |
| GPTQ               | NaN         | NaN         | NaN    | Inf         | Inf         | 6.01   | Inf         | Inf         | 7.29   | Inf             | Inf         | 8.39   |
| (RO) QuaRot        | 7.96        | 7.71        | 5.61   | 6.00        | 5.92        | 4.99   | 10.54       | 10.15       | 6.52   | 6.05            | 5.98        | 5.40   |
| (RO) QuaRot.FP16() | <b>6.17</b> | <b>6.10</b> | -      | <b>5.38</b> | <b>5.34</b> | -      | <b>7.83</b> | <b>7.68</b> | -      | <b>5.79</b>     | <b>5.73</b> | -      |
| (RH) QuaRot        | 6.27        | 6.20        | 5.61   | 5.51        | 5.46        | 5.01   | 8.20        | 8.02        | 6.52   | 5.81            | 5.75        | 5.40   |
| (RH) QuaRot.FP16() | <b>6.17</b> | <b>6.10</b> | -      | <b>5.40</b> | <b>5.37</b> | -      | <b>7.82</b> | <b>7.67</b> | -      | <b>5.78</b>     | <b>5.73</b> | -      |

The output of LayerNorm is then passed into the subsequent linear blocks. With the introduction of  $\mathbf{R}_1$ , the input to these linear layers is altered. To ensure that the output from the linear layers remains unchanged,  $\mathbf{R}_1^T$  is multiplied by the weight matrix  $\mathbf{W}$ , resulting in a new weight matrix  $\mathbf{R}_1^T \mathbf{W}$ , which can be calculated offline. Since  $\mathbf{R}_1^T \mathbf{R}_1 = \mathbf{I}$ , the output from the linear layer remains unaffected. This *computational invariance* property of LLMs ensure the introduction of the rotation matrices without changing the original results.

A similar approach can be applied to rest layers within an LLM block. As shown in Figure 1, by transforming the weight matrices in the Multi-Head Attention (MHA) as  $\mathbf{R}_1^T \mathbf{W}_q$ ,  $\mathbf{R}_1^T \mathbf{W}_k$ ,  $\mathbf{R}_1^T \mathbf{W}_v$ , and  $\mathbf{W}_o \mathbf{R}_1$ , and the weights in the Feed-Forward Network (FFN) as  $\mathbf{R}_1^T \mathbf{W}_{up}$ ,  $\mathbf{R}_1^T \mathbf{W}_{gate}$ , and  $\mathbf{W}_{down} \mathbf{R}_1$ , the hidden features within both MHA and FFN remain unchanged. Consequently, the output feature  $\mathbf{Y}_1$  is transformed into  $\mathbf{Y}_1 \mathbf{R}_1$ , which will sum with the residual input  $\mathbf{X}_1 \mathbf{R}_1$  satisfies  $\mathbf{X}_1 \mathbf{R}_1 + \mathbf{Y}_1 \mathbf{R}_1 = (\mathbf{X}_1 + \mathbf{Y}_1) \mathbf{R}_1 = \mathbf{X}_2 \mathbf{R}_1$ . The output will serve as the input for the next LLM block. Similarly, by transforming  $\mathbf{W}_{lm\_head}$  to  $\mathbf{R}_1^T \mathbf{W}_{lm\_head}$ , the network output will remain unchanged.

Moreover, we can introduce additional rotation matrices to further mitigate outliers between layers. As illustrated in Figure 1, head-wise rotation matrices  $\mathbf{R}_2$  and  $\mathbf{R}_2^T$  can be applied to  $\mathbf{W}_v$  and  $\mathbf{W}_o$ , while  $\mathbf{R}_3$  can be inserted for **Query** and **Key** after RoPE. Additionally,  $\mathbf{R}_4$  and  $\mathbf{R}_4^T$  can be placed between the Swish activation and  $\mathbf{W}_{down}$ . These strategies help further suppress outliers and reduce quantization error without affecting the block’s output. In this paper, we focus exclusively on  $\mathbf{R}_1$ . For  $\mathbf{R}_2$ ,  $\mathbf{R}_3$ , and  $\mathbf{R}_4$ , we adopt the settings from QuaRot (Ashkboos et al., 2024b) by setting them to random Hadamard matrices.

### 3.2 WHY THE RANDOMIZED HADAMARD IS BETTER?

Based on the computational invariance described in Section 3.1, it is evident that the choice of rotation matrices is critical for ensuring the accuracy performance of the quantized model. Therefore, a natural question arises: *What type of rotation matrix offers the most advantageous properties?* We begin by focusing on RO and RH, as both QuaRot (Ashkboos et al., 2024b) and SpinQuant (Liu et al., 2024) have shown that the latter delivers substantial improvements over the former in LLMs. We conducted experiments by applying RO and RH to the LLaMA and Mistral models, followed by weight quantization using GPTQ under various settings. The results are shown in Table 1, benefiting from the outlier elimination through rotation, we find that for 8-bit activation quantization, both RO and RH lead to significant performance improvements compared to standard quantization. Additionally, no substantial difference is observed between the two methods. However, **under 4-bit token-wise activation quantization, RH significantly outperforms RO.**

To investigate the performance differences between RH and RO under 4-bit activation setting, we plot the corresponding quantization error after applying 4-bit quantization to the multiple tokens. We also display the quantization error for the baseline setting where quantization is applied without rotating the activation to better understand the impact of using the rotation matrix. As shown in Figure 2, compared to the no rotation (NR), both RO and RH effectively reduce the quantization error for most tokens across different models. While RH slightly lowers the quantization error, the difference between the two methods is minimal for the majority of tokens. This leads to the



216  
217  
218  
219  
220  
221  
222  
223  
224  
225  
226  
227  
228  
229  
230  
231  
232  
233  
234  
235  
236  
237  
238  
239  
240  
241  
242  
243  
244  
245  
246  
247  
248  
249  
250  
251  
252  
253  
254  
255  
256  
257  
258  
259  
260  
261  
262  
263  
264  
265  
266  
267  
268  
269

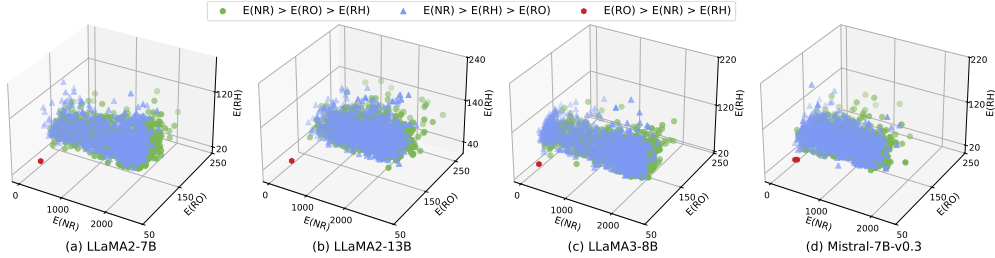

Figure 2: Comparison of 4-bit activation quantization error  $E(\cdot)$  for each token with NR, RO and RH for (a) LLaMA2-7B, (b) LLaMA-2-13B, (c) LLaMA3-8B and (d) Mistral-7B-v0.3. The tokens are from model.layers.6.post\_attention\_layernorm. Best viewed in color.

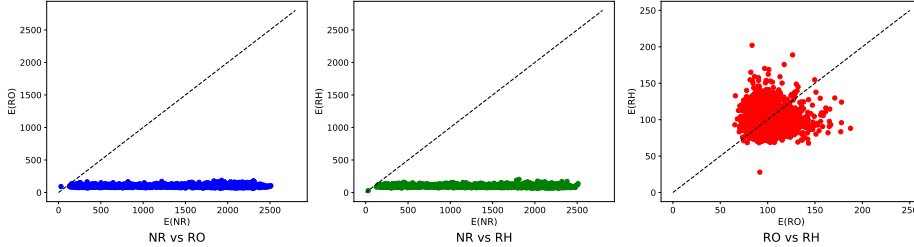

Figure 3: Comparison of 2D 4-bit quantization errors for tokens with NR, RO and RH for LLaMA3-8B from Figure 2.

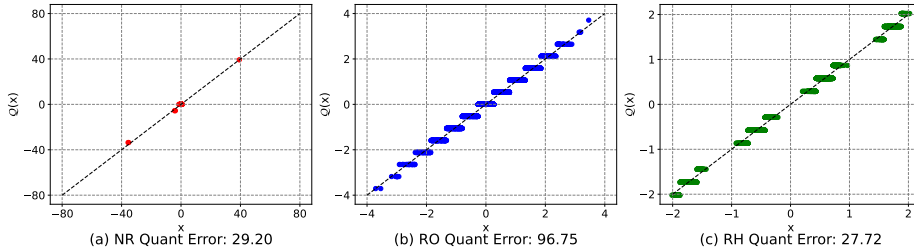

Figure 4: Comparison of 4-bit quantization error for the token with massive activation with NR, RO and RH for LLaMA3-8B from Figure 2.

question: **What explains the significant difference in accuracy during quantization when their quantization errors are so similar?**

To answer this question, we turn our attention to massive activation (Sun et al., 2024), a rare but significant feature in LLMs. Since each token has a fixed  $L_2$  norm after RMSNorm processing, tokens with massive activation naturally exhibit smaller quantization errors when quantized to 4-bit. As shown in Figure 2, the red points represent tokens with massive activation. While most tokens show large quantization errors under NR, these special tokens display significantly smaller errors, which can be observed from Figure 3. Figure 4 presents the quantization error distribution for tokens with massive activation after applying RO, RH, and NR. Surprisingly, the rotation operations do not significantly reduce quantization errors for these tokens. In fact, compared to NR, RO greatly increases their quantization errors, while RH only marginally reduces it. This leads us to question whether tokens with massive activation are the primary cause of the significant accuracy discrepancies between RH and RO.

To investigate this further, we build upon QuaRot by retaining tokens with massive activations in FP16 format for both RO and RH, while applying 4-bit quantization to the remaining input tokens. Therefore, we can conclude that the fundamental reason for the performance disparity between RO and RH is that **RH more effectively reduces the quantization error for tokens with massive activations in 4-bit activation quantization.**

### 3.3 OPTIMIZATION OBJECTIVES AND CALIBRATION DATA SELECTION

The evaluation results in Section 3.2 show that applying 4-bit quantization to activations leads to significant quantization errors due to the large volume of activations, ultimately causing accuracy

270 degradation. While encoding these activations more precisely could alleviate the issue, it results in  
 271 a mixed quantization approach that is not well-suited for current GPU platforms. A good rotation  
 272 matrix  $\mathbf{R}_1$  should minimize the different between the original input  $\mathbf{x}$  and its quantized version,  
 273 namely:

$$274 \mathcal{L}(\mathbf{R}_1, \mathbf{g}) = \mathbb{E}_{\mathbf{x}} \left[ \|\mathbf{x}\mathbf{R}_1 - \mathcal{Q}_{\mathbf{g}}(\mathbf{x}\mathbf{R}_1)\|_2^2 \right], \quad (1)$$

275 where  $\mathbf{x} \in \mathcal{R}^C$  is the token vector from a calibration dataset  $\mathbf{X}^{cal}$ ,  $C$  is the number of channels.  $\mathbf{R}_1$   
 276 satisfies  $\mathbf{R}_1\mathbf{R}_1^T = \mathbf{I}$ ,  $\mathbf{g}$  is the quantization parameters and  $\mathcal{Q}_{\mathbf{g}}(\mathbf{x})$  is the quantization representation  
 277 of the  $\mathbf{x}$ . The size of  $\mathcal{Q}_{\mathbf{g}}(\mathbf{x})$  is the same to the  $\mathbf{x}$ . The expectation  $\mathbb{E}[\cdot]$  is taken over the token  
 278 distribution. For simplicity in analysis, we utilize the mean squared error, denoted as  $\|\cdot\|_2$ .  
 279

280 To better adapt  $\mathbf{R}_1$  to the massive activations, we adjust it by optimizing the following loss function:

$$281 \mathcal{L}(\mathbf{R}_1, \mathbf{g}) = \mathbb{E}_{\mathbf{x} \in \mathbf{X}^{cal} \setminus \mathbf{X}^m} \left[ \|\mathbf{x}\mathbf{R}_1 - \mathcal{Q}_{\mathbf{g}}(\mathbf{x}\mathbf{R}_1)\|_2^2 \right] + \gamma \mathbb{E}_{\mathbf{x} \in \mathbf{X}^m} \left[ \|\mathbf{x}\mathbf{R}_1 - \mathcal{Q}_{\mathbf{g}}(\mathbf{x}\mathbf{R}_1)\|_2^2 \right]. \quad (2)$$

282 where  $\mathbf{X}^m \subseteq \mathbf{X}^{cal}$  denotes the subset of tokens with massive activations, while  $\mathbf{X}^{cal} \setminus \mathbf{X}^m$  repre-  
 283 sents the remaining tokens. During calibration, we apply a weighted loss to prioritize the quantiza-  
 284 tion error on tokens with massive activations, with  $\gamma$  representing the weight.  
 285

286 The motivation behind this principle stems from the observations in Table 1. Since  $\mathbf{X}^m$  is the  
 287 key factor contributing to the performance gap between RO and RH. Simply optimizing  $\mathbf{R}_1$  over  
 288 the entire  $\mathbf{X}^{cal}$  fails to specifically target  $\mathbf{X}^m$ . Additionally, compared to the NR approach in  
 289 Table 1, RO also significantly improves performance, indicating that reducing the outliers on  $\mathbf{X}^{cal} \setminus$   
 290  $\mathbf{X}^m$  can enhance the performance of the quantization method. However, optimizing only for  $\mathbf{X}^m$   
 291 risks overfitting, which could increase the quantization error for  $\mathbf{X} \setminus \mathbf{X}^m$ , ultimately degrading  
 292 the model’s overall performance. Hence, it is crucial to optimize both  $\mathbf{X}^m$  and  $\mathbf{X} \setminus \mathbf{X}^m$ . Using a  
 293 weighted approach to optimize the quantization loss is a straightforward yet highly effective method.  
 294 Ablation studies in Section 4.2 further demonstrate the advantages of this strategy.  
 295

### 296 3.4 SOLUTION METHODS

297 Optimizing  $\mathbf{R}_1$  is a challenging task. Since  $\mathbf{R}_1$  influences every MHA and FFN in the network,  
 298 adjusting the activation distribution in one layer impacts the quantization outcomes across all layers.  
 299 This makes it difficult to optimize layer by layer or block by block (Shao et al., 2023; Wei et al.,  
 300 2023). A straightforward approach is to use training methods for quantization-aware fine-tuning of  
 301 the rotation matrix across the entire network (Liu et al., 2024). However, this approach necessitates  
 302 fine-tuning the entire network. Although it does not require retaining the gradients of the weights or  
 303 the corresponding states in the optimizer, it still demands substantial computational resources during  
 304 the quantization process.  
 305

306 In this paper, we focus on improving the effectiveness of rotation matrices in mitigating outliers in  
 307 activation values. Intuitively, we hypothesize that a rotation matrix that minimizes quantization error  
 308 will lead to fewer activation outliers and, consequently, better performance. Drawing inspiration  
 309 from Simsiam (Chen & He, 2021), we propose to regard quantization representation  $\mathcal{Q}_{\mathbf{g}}(\mathbf{x}\mathbf{R}_1)$  as  
 310 cluster centroids  $\boldsymbol{\eta}_{\mathbf{x}}$ . In the context, optimizing  $\mathbf{R}_1$  and  $\mathbf{g}$  is equivalent to optimizing  $\mathbf{R}_1$  and  $\boldsymbol{\eta}$ ,  
 311 which can be viewed as an implementation of an Expectation-Maximization (EM)-like algorithm,  
 312 as shown in the following equation:

$$313 \min_{\mathbf{R}_1, \boldsymbol{\eta}} \mathcal{L}(\mathbf{R}_1, \boldsymbol{\eta}) = \mathbb{E}_{\mathbf{x} \in \mathbf{X}^{cal} \setminus \mathbf{X}^m} \left[ \|\mathbf{x}\mathbf{R}_1 - \boldsymbol{\eta}_{\mathbf{x}}\|_2^2 \right] + \gamma \mathbb{E}_{\mathbf{x} \in \mathbf{X}^{cal}} \left[ \|\mathbf{x}\mathbf{R}_1 - \boldsymbol{\eta}_{\mathbf{x}}\|_2^2 \right], \quad (3)$$

314 where  $\boldsymbol{\eta}_{\mathbf{x}} = \mathcal{Q}_{\mathbf{g}}(\mathbf{x}\mathbf{R}_1)$ . This formulation is analogous to k-means clustering (Macqueen, 1967),  
 315 and  $\mathbf{R}_1$  acts like the kernel function, representing the learnable rotation matrix. Similar to k-means  
 316 clustering, the problem described in Eq 3 can be approached using an alternating algorithm, where  
 317 one set of variables is fixed while solving for the other. Formally, we can alternate between solving  
 318 these two subproblems:

$$319 \boldsymbol{\eta}^t \leftarrow \arg \min_{\boldsymbol{\eta}} \mathcal{L}(\mathbf{R}_1^{t-1}, \boldsymbol{\eta}) \quad (4)$$

$$320 \mathbf{R}_1^t \leftarrow \arg \min_{\mathbf{R}_1} \mathcal{L}(\mathbf{R}_1, \boldsymbol{\eta}^t) \quad (5)$$

321 where  $t$  represents the iteration index of the alternating rounds, and  $\boldsymbol{\eta}^t$  and  $\mathbf{R}_1^t$  denote the values of  
 322  $\boldsymbol{\eta}$  and  $\mathbf{R}_1$  at round  $t$ .  
 323

**Solving for the cluster centroids  $\eta_x$**  The set of quantization parameters  $\mathbf{g}\{s, z\}$  further contains the quantization scale  $s$  and zero point  $z$ . Assume we apply the static quantization, the  $s^t, z^t$  and  $\eta_x$  can be solved by the following equations:

$$s^t, z^t \leftarrow \arg \min_{s, z} \mathbb{E}_x \left[ \left\| \mathbf{x} \mathbf{R}_1^{t-1} - \mathcal{Q}_{s, z}(\mathbf{x} \mathbf{R}_1^{t-1}) \right\|_2^2 \right], \eta_x^t \leftarrow \mathcal{Q}_{s^t, z^t}(\mathbf{x} \mathbf{R}_1^{t-1}) \quad (6)$$

In the case of dynamic asymmetric per-token quantization, we can independently determine the optimal quantization scheme for solving  $s_x$  and  $z_x$  for each  $\mathbf{x} \mathbf{R}_1$ :

$$\eta_x = \mathcal{Q}_g(\mathbf{x} \mathbf{R}_1) = \text{clamp} \left( \left\lfloor \frac{\mathbf{x} \mathbf{R}_1}{s} \right\rfloor + z, 0, 2^N - 1 \right), \quad (7)$$

where  $s_x = \frac{\alpha \max(\mathbf{x} \mathbf{R}_1) - \beta \min(\mathbf{x} \mathbf{R}_1)}{2^N - 1}$ ,  $z_x = - \left\lfloor \frac{\beta \min(\mathbf{x} \mathbf{R}_1)}{s_x} \right\rfloor$

where  $\lfloor \cdot \rfloor$  indicates round operation,  $N$  is the bitwidth, and  $\alpha$  and  $\beta$  is the clip ratio for upper bound and lower bound of quantization, respectively.

**Solving for  $\mathbf{R}_1$ .** Eq 5 is well-known as Procrustes problem (Mulaik, 2009). which involves finding the optimal rotation matrix  $\mathbf{R}_1$  that best aligns two sets of points, minimizing the Frobenius norm of their difference. The solution to this problem can be obtained through Singular Value Decomposition (SVD). Specifically, given input matrices  $\mathbf{X} = \{\mathbf{x}\}$  and its quantized version  $\mathcal{Q}_g(\mathbf{X}) = \{\mathcal{Q}_g(\mathbf{x})\}$ , the optimal  $\mathbf{R}_1$  can be found:

$$\mathbf{R}_1 = \mathbf{U} \mathbf{V}^T, \text{ where } \mathbf{U}, \Sigma, \mathbf{V}^T = \text{SVD}(\mathbf{X}^T \mathcal{Q}_g(\mathbf{X})). \quad (8)$$

where we treat the quantization parameters  $\mathbf{g}^t$  as a constant.

**One-step optimization.** To find an improved rotation matrix  $\mathbf{R}_1$  and quantization parameters  $\mathbf{g}$ , we perform the iterative process shown in Eq 4 and Eq 5 with just one round, which already yields significantly better performance, as demonstrated in the evaluation (Section 4). Specifically, a calibration set  $\mathbf{X}^{cal}$  is randomly sampled from  $\mathbf{X}$ , the iterative process can be specified as:

$$s^t, z^t \leftarrow \arg \min_{s, z} \sum_{\mathbf{x} \in \mathbf{X}^{cal}} \left[ \left\| \mathbf{x} \mathbf{R}_1^{t-1} - \mathcal{Q}_{s, z}(\mathbf{x} \mathbf{R}_1^{t-1}) \right\|_2^2 \right], \eta_x^t \leftarrow \mathcal{Q}_{s^t, z^t}(\mathbf{x} \mathbf{R}_1^{t-1}), \quad (9)$$

then the resulting quantization parameters will be used to produce the rotation matrix:

$$\mathbf{R}_1^t \leftarrow \arg \min_{\mathbf{R}_1} \sum_{\mathbf{x} \in \mathbf{X}^{cal}} \left[ \left\| \mathbf{x} \mathbf{R}_1 - \eta_x^t \right\|_2^2 \right] \quad (10)$$

The detailed algorithm is provided in Algorithm 1 in Appendix.

## 4 EXPERIMENTS

**Experiment settings.** We implemented DFRot based on QuaRot<sup>1</sup>. In this paper, to simplify the problem, we apply dynamic asymmetric per-token quantization for activation values without searching for clip ratios, and we fix  $(\alpha, \beta)$  to  $(1.0, 1.0)$ . The KV-cache is quantized using asymmetric quantization with a group size of 128 and a constant clipping ratio of 1.0. RTN and GPTQ (Frantar et al., 2022) are used for weight with per-channel symmetric quantization, where a linear search for the clipping ratio is applied to minimize squared error. We use 128 samples from the WikiText-2 (Merity et al., 2016) training set, each with a sequence length of 2048, as the calibration dataset for GPTQ quantization. We use a RH to initialize the rotation matrix and optimize it for 100 iterations.

### 4.1 MAIN RESULTS

**Language Generation Task.** Firstly, we evaluate DFRot on a language generation task and compare it with QuaRot. We quantize the weights using both the RTN and GPTQ methods. Table 2 shows the perplexity of LLaMA and Mistral models. As shown, compared to QuaRot, DFRot

<sup>1</sup><https://github.com/spcl/QuaRot>

Table 2: WikiText-2 perplexity ( $\downarrow$ ) results for LLaMA and Mistral. The 4-4-4 and 4-4-16 represent W4A4KV4, W4A4KV16, respectively. We show the failed GPTQ experiments using NaN and the perplexity results  $>100$  by Inf.

| Method      | LLaMA2-7B |        | LLaMA2-13B |        | LLaMA3-8B |        | Mistral-7B-v0.3 |        |
|-------------|-----------|--------|------------|--------|-----------|--------|-----------------|--------|
| Baseline    | 5.47      |        | 4.88       |        | 6.14      |        | 5.32            |        |
| Extra Time  | +8min     |        | +20min     |        | +8min     |        | +8min           |        |
|             | 4-4-4     | 4-4-16 | 4-4-4      | 4-4-16 | 4-4-4     | 4-4-16 | 4-4-4           | 4-4-16 |
| RTN         | NaN       | NaN    | Inf        | Inf    | Inf       | Inf    | Inf             | Inf    |
| QuaRot-RTN  | 9.04      | 8.69   | 6.31       | 6.23   | 11.06     | 10.47  | 6.38            | 6.29   |
| DFRot-RTN   | 7.68      | 7.47   | 6.21       | 6.12   | 9.67      | 9.35   | 6.36            | 6.27   |
| GPTQ        | NaN       | NaN    | Inf        | Inf    | Inf       | Inf    | Inf             | Inf    |
| QuaRot-GPTQ | 6.27      | 6.20   | 5.51       | 5.47   | 8.20      | 8.02   | 5.81            | 5.75   |
| DFRot-GPTQ  | 6.21      | 6.14   | 5.47       | 5.39   | 7.95      | 7.81   | 5.81            | 5.76   |

Table 3: Zero-shot accuracy ( $\uparrow$ ) of LLaMA and Mistral with GPTQ on PIQA (PQ), WinoGrande (WG), HellaSwag (HS), Arc-Easy (A-e), Arc-Challenge (A-c), and LAMBADA (LA).

| Model           | Method | W-A-KV   | PQ    | WG    | HS    | A-e   | A-c   | LA    | Avg.  |
|-----------------|--------|----------|-------|-------|-------|-------|-------|-------|-------|
| LLaMA2-7B       | FP16   | 16-16-16 | 79.11 | 68.98 | 75.99 | 74.54 | 46.42 | 73.88 | 69.82 |
|                 | QuaRot | 4-4-16   | 76.06 | 65.67 | 73.00 | 69.82 | 42.24 | 69.42 | 66.03 |
|                 |        | 4-4-4    | 76.33 | 64.96 | 72.69 | 68.60 | 41.64 | 68.58 | 65.47 |
| DFRot           | 4-4-16 | 77.15    | 65.82 | 73.17 | 69.78 | 44.37 | 70.66 | 66.83 |       |
|                 | 4-4-4  | 76.22    | 64.96 | 72.41 | 70.75 | 42.66 | 69.92 | 66.15 |       |
| LLaMA2-13B      | FP16   | 16-16-16 | 80.52 | 72.22 | 79.39 | 77.48 | 49.15 | 76.75 | 72.58 |
|                 | QuaRot | 4-4-16   | 77.91 | 68.51 | 75.94 | 73.57 | 46.25 | 72.97 | 69.19 |
|                 |        | 4-4-4    | 78.73 | 70.40 | 75.82 | 73.74 | 46.33 | 72.73 | 69.63 |
| DFRot           | 4-4-16 | 78.73    | 69.30 | 76.99 | 72.69 | 45.82 | 75.41 | 69.82 |       |
|                 | 4-4-4  | 79.82    | 68.43 | 76.70 | 72.64 | 46.59 | 75.33 | 69.92 |       |
| LLaMA3-8B       | FP16   | 16-16-16 | 80.79 | 72.85 | 79.16 | 77.78 | 53.33 | 76.03 | 73.32 |
|                 | QuaRot | 4-4-16   | 74.92 | 66.61 | 73.39 | 70.29 | 44.54 | 67.71 | 66.24 |
|                 |        | 4-4-4    | 75.14 | 66.54 | 72.32 | 68.64 | 42.41 | 66.04 | 65.18 |
| DFRot           | 4-4-16 | 76.22    | 68.03 | 73.92 | 70.41 | 45.65 | 68.87 | 67.18 |       |
|                 | 4-4-4  | 75.68    | 66.77 | 73.56 | 70.29 | 45.14 | 68.99 | 66.74 |       |
| Mistral-7B-v0.3 | FP16   | 16-16-16 | 82.26 | 73.88 | 80.41 | 78.20 | 52.30 | 75.32 | 73.73 |
|                 | QuaRot | 4-4-16   | 79.54 | 69.30 | 77.81 | 75.51 | 47.95 | 73.76 | 70.65 |
|                 |        | 4-4-4    | 79.38 | 69.06 | 77.36 | 74.54 | 48.29 | 73.55 | 70.36 |
| DFRot           | 4-4-16 | 79.87    | 69.53 | 78.24 | 75.88 | 48.46 | 73.01 | 70.83 |       |
|                 | 4-4-4  | 80.36    | 69.61 | 78.01 | 75.55 | 47.95 | 72.39 | 70.65 |       |

achieves improvements in most cases. Notably, DFRot achieves the most significant improvement on the LLaMA3-8B model with W4A4KV4 and W4A4KV16 using GPTQ, outperforming QuaRot by 0.25 and 0.21, respectively. Similar to QuaRot, DFRot does not require any retraining process and only needs an additional sample to optimize the rotation matrix. On a single NVIDIA A100 GPU, optimizing the rotation matrix takes an extra 8 minutes for embeddings of 4096 (LLaMA2-7B, LLaMA3-8B & Mistral-7B-v0.3) and 20 minutes for 5120 (LLaMA2-13B), resulting in minimal overhead. It demonstrates that DFRot has wide applicability and can serve as a cost-effective method to enhance the quantization performance of rotated LLMs.

**Zero-Shot Tasks.** Following QuaRot, we also evaluate DFRot on the following six important zero-shot tasks: PIQA (Bisk et al., 2020), WinoGrande (Sakaguchi et al., 2021), HellaSwag (Zellers et al., 2019), Arc (Easy and Challenge) (Clark et al., 2018) and LAMBADA (Radford et al., 2019). We used  $lm\_eval=0.4.3$  (Gao et al., 2024) and GPTQ for our experiments, with default parameters and weight quantization, respectively. Table 3 shows the accuracy of DFRot on the above tasks as well as the average score. As can be seen, DFRot consistently achieves improvements compared to

432 QuaRot across all tasks. For example, DFRot achieves a 1.56% accuracy improvement compared to  
 433 QuaRot on the LLaMA3-8B model with W4A4KV4 quantization settings.  
 434

## 4.2 ABLATION STUDIES

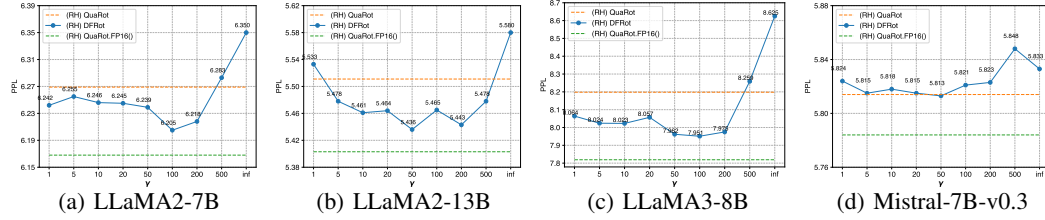

445 Figure 5: (RH) Comparison of WikiText-2 perplexity results under different  $\gamma$  for W4A4KV4.  
 446 Weight is quantized via GPTQ.  $\gamma \rightarrow \infty$  denotes we only optimize quantization error for  $X^m$ .

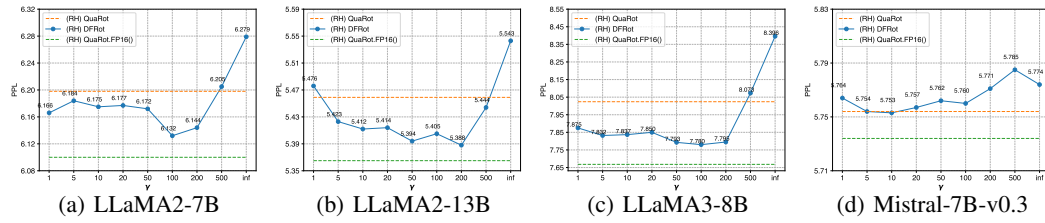

445 Figure 6: (RH) Comparison of WikiText-2 perplexity results under different  $\gamma$  for W4A4KV16.  
 446 Weight is quantized via GPTQ.  $\gamma \rightarrow \infty$  denotes we only optimize quantization error for  $X^m$ .

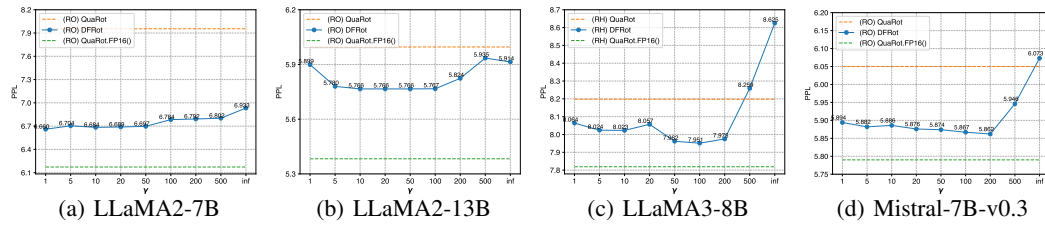

445 Figure 7: (RO) Comparison of WikiText-2 perplexity results under different  $\gamma$  for W4A4KV4.  
 446 Weight is quantized via GPTQ.  $\gamma \rightarrow \infty$  denotes we only optimize quantization error for  $X^m$ .

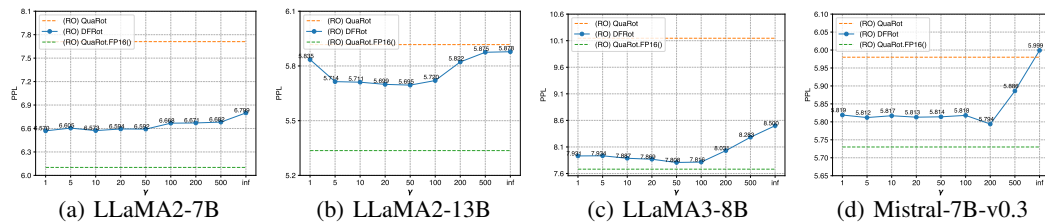

445 Figure 8: (RO) Comparison of WikiText-2 perplexity results under different  $\gamma$  for W4A4KV16.  
 446 Weight is quantized via GPTQ.  $\gamma \rightarrow \infty$  denotes we only optimize quantization error for  $X^m$ .

447 **Choice of  $\gamma$ .** To further understand the effect of hyperparameters in DFRot, we conducted an  
 448 ablation study on Wikitext-2 PPL to investigate the impact of different  $\gamma$  settings for W4A4KV4  
 449 and W4A4KV16. As seen in Figures 5 and 6, when  $\gamma$  ranges between 50 and 200, DFRot achieves  
 450 significant improvements across various LLaMa models using RH. Notably, on the LLaMA3-  
 451 8B model, known for its quantization challenges, we observed a PPL improvement of over 0.2.  
 452 If we set  $\gamma = 1$  and treat  $X \setminus X^m$  and  $X^m$  equally to minimize their quantization errors, it  
 453 may reduce the quantization loss of  $X \setminus X^m$  but increase the quantization loss of  $X^m$ , ultimately  
 454 resulting in a performance decline on the LLaMA2-13B. Conversely, if we set  $\gamma \rightarrow \infty$  and only  
 455 optimize the quantization error for  $X^m$ , it will increase the quantization error of  $X \setminus X^m$ , resulting  
 456 in an accuracy drop across the LLaMA2-7B, LLaMA2-13B, and LLaMA3-8B. It is also worth

486 mentioning that the trend observed in the Mistral-7B-v0.3 model significantly differs from that of  
 487 the LLaMA models. We believe this is primarily because, compared to the LLaMA models, the RH  
 488 has effective in reducing the quantization error on  $X^m$  as shown in Figure 13. Therefore, optimizing  
 489 the quantization error of  $X^m$  does not have a noticeable impact on the Mistral-7B-v0.3.  
 490

491 **Initialize with Randomized Orthogonal.** We conducted an ablation study on the use of RO with  
 492 varying  $\gamma$  values. From Figure 7 and Figure 8, it can be observed that, compared to using RH for  
 493 initialization, our method achieved significant improvements in RO scenarios. However, due to the  
 494 exceptional performance of RH, initialization and optimization using RH often yield superior final  
 495 results compared to those obtained with random initialization.  
 496

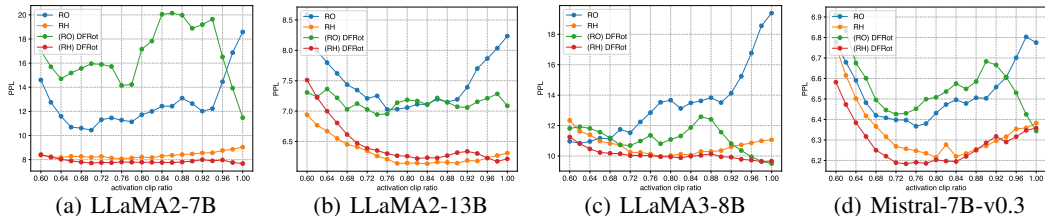

505 Figure 9: Comparison of WikiText-2 perplexity results under different activation clip ratio for  
 506 W4A4KV4. Weight is quantized via RTN.

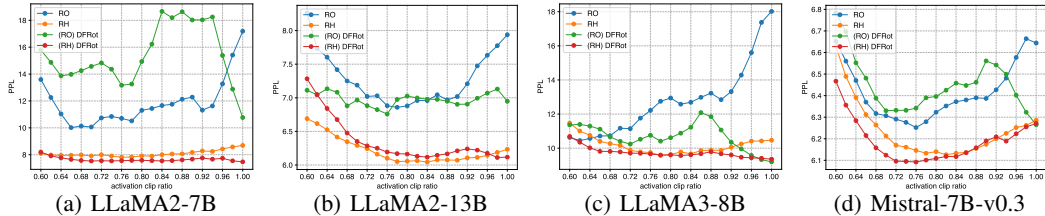

515 Figure 10: Comparison of WikiText-2 perplexity results under different activation clip ratio for  
 516 W4A4KV16. Weight is quantized via RTN.

517 **Ablation studies for activation clip ratio for RTN.** Activation clipping is a widely used quan-  
 518 tization optimization technique, particularly effective for RTN. As shown in Figures 9 and 10, we  
 519 conducted an experiment to investigate the effectiveness of DFRot for RTN quantization. The ex-  
 520 perimental results show DFRot always achieves better PPL at appropriate activation clip ratios.  
 521 When the rotation matrix is initialized with RH, DFRot also achieves better results compared to  
 522 RO. Additionally, we find that compared to GPTQ, which updates weights through compensation  
 523 mechanisms, DFRot has a more pronounced effect on RTN quantization as it directly optimizes  
 524 quantization errors. We believe that DFRot can further enhance the performance of methods like  
 525 QServe, which do not incorporate GPTQ.  
 526

527 **5 CONCLUSION**

528 Eliminating outliers in LLMs through rotational invariance can significantly improve model quan-  
 529 tization accuracy. In this paper, we find that in the context of 4-bit activation quantization, the  
 530 fundamental reason for the difference in effectiveness between RO and RH is their performance on  
 531 tokens with massive activations. Specifically, randomized Hadamard transformations perform better  
 532 on these tokens. Based on this observation, we treat the problem as a long-tail optimization and  
 533 construct a simple yet effective weighted quantization loss function to balance the importance of  
 534 tokens. Furthermore, by alternately optimizing quantization parameters and employing orthogonal  
 535 Procrustes transformations to refine the rotation matrix, our method, named DFRot, enhances the  
 536 Rotated LLMs by achieving Dual Free, including *Outlier-Free* and *Massive Activation-Free*. DFRot  
 537 significantly improves model accuracy in 4-bit activation quantization with just a single data sample  
 538 and extra 8 minutes, achieving PPL improvements of 0.25 and 0.21 on W4A4KV4 and W4A4KV16,  
 539 respectively, for the LLaMA3-8B, which is notable for its quantization challenges.

## REFERENCES

- 540  
541  
542 Josh Achiam, Steven Adler, Sandhini Agarwal, Lama Ahmad, Ilge Akkaya, Florencia Leoni Ale-  
543 man, Diogo Almeida, Janko Altenschmidt, Sam Altman, Shyamal Anadkat, et al. Gpt-4 technical  
544 report. *arXiv preprint arXiv:2303.08774*, 2023.
- 545 Saleh Ashkboos, Maximilian L Croci, Marcelo Gennari do Nascimento, Torsten Hoefler, and James  
546 Hensman. Slicegpt: Compress large language models by deleting rows and columns. *arXiv*  
547 *preprint arXiv:2401.15024*, 2024a.
- 548 Saleh Ashkboos, Amirkeivan Mohtashami, Maximilian L Croci, Bo Li, Martin Jaggi, Dan Alistarh,  
549 Torsten Hoefler, and James Hensman. Quarot: Outlier-free 4-bit inference in rotated llms. *arXiv*  
550 *preprint arXiv:2404.00456*, 2024b.
- 551 Yonatan Bisk, Rowan Zellers, Jianfeng Gao, Yejin Choi, et al. Piqa: Reasoning about physical com-  
552 monsense in natural language. In *Proceedings of the AAAI conference on artificial intelligence*,  
553 pp. 7432–7439, 2020.
- 554 Jerry Chee, Yaohui Cai, Volodymyr Kuleshov, and Christopher M De Sa. Quip: 2-bit quantization  
555 of large language models with guarantees. *Advances in Neural Information Processing Systems*,  
556 36, 2024.
- 557  
558 Xinlei Chen and Kaiming He. Exploring simple siamese representation learning. In *Proceedings of*  
559 *the IEEE/CVF conference on computer vision and pattern recognition*, pp. 15750–15758, 2021.
- 560 Peter Clark, Isaac Cowhey, Oren Etzioni, Tushar Khot, Ashish Sabharwal, Carissa Schoenick, and  
561 Oyvind Tafjord. Think you have solved question answering? try arc, the ai2 reasoning challenge.  
562 *arXiv preprint arXiv:1803.05457*, 2018.
- 563  
564 Tim Dettmers, Mike Lewis, Younes Belkada, and Luke Zettlemoyer. Gpt3. int8 (:): 8-bit matrix  
565 multiplication for transformers at scale. *Advances in Neural Information Processing Systems*, 35:  
566 30318–30332, 2022.
- 567 Elias Frantar and Dan Alistarh. Sparsegpt: Massive language models can be accurately pruned in  
568 one-shot. In *International Conference on Machine Learning*, pp. 10323–10337. PMLR, 2023.
- 569  
570 Elias Frantar, Saleh Ashkboos, Torsten Hoefler, and Dan Alistarh. Gptq: Accurate post-training  
571 quantization for generative pre-trained transformers. *arXiv preprint arXiv:2210.17323*, 2022.
- 572  
573 Leo Gao, Jonathan Tow, Baber Abbasi, Stella Biderman, Sid Black, Anthony DiPofi, Charles Foster,  
574 Laurence Golding, Jeffrey Hsu, Alain Le Noac’h, Haonan Li, Kyle McDonell, Niklas Muen-  
575 nighoff, Chris Ociepa, Jason Phang, Laria Reynolds, Hailey Schoelkopf, Aviya Skowron, Lin-  
576 tang Sutawika, Eric Tang, Anish Thite, Ben Wang, Kevin Wang, and Andy Zou. A framework  
577 for few-shot language model evaluation, 07 2024. URL [https://zenodo.org/records/](https://zenodo.org/records/12608602)  
578 [12608602](https://zenodo.org/records/12608602).
- 579 Dan Hendrycks, Collin Burns, Steven Basart, Andy Zou, Mantas Mazeika, Dawn Song, and  
580 Jacob Steinhardt. Measuring massive multitask language understanding. *arXiv preprint*  
581 *arXiv:2009.03300*, 2020.
- 582  
583 Wei Huang, Xudong Ma, Haotong Qin, Xingyu Zheng, Chengtao Lv, Hong Chen, Jie Luo, Xiaojuan  
584 Qi, Xianglong Liu, and Michele Magno. How good are low-bit quantized llama3 models? an  
585 empirical study. *arXiv preprint arXiv:2404.14047*, 2024.
- 586 Albert Q Jiang, Alexandre Sablayrolles, Arthur Mensch, Chris Bamford, Devendra Singh Chaplot,  
587 Diego de las Casas, Florian Bressand, Gianna Lengyel, Guillaume Lample, Lucile Saulnier, et al.  
588 Mistral 7b. *arXiv preprint arXiv:2310.06825*, 2023.
- 589 Jun Li, Li Fuxin, and Sinisa Todorovic. Efficient riemannian optimization on the stiefel manifold  
590 via the cayley transform. *arXiv preprint arXiv:2002.01113*, 2020.
- 591  
592 Yuhang Li, Ruihao Gong, Xu Tan, Yang Yang, Peng Hu, Qi Zhang, Fengwei Yu, Wei Wang, and  
593 Shi Gu. Brecq: Pushing the limit of post-training quantization by block reconstruction. *arXiv*  
*preprint arXiv:2102.05426*, 2021.

- 594 Ji Lin, Jiaming Tang, Haotian Tang, Shang Yang, Wei-Ming Chen, Wei-Chen Wang, Guangxuan  
595 Xiao, Xingyu Dang, Chuang Gan, and Song Han. Awq: Activation-aware weight quantization for  
596 on-device llm compression and acceleration. *Proceedings of Machine Learning and Systems*, 6:  
597 87–100, 2024a.
- 598 Yujun Lin, Haotian Tang, Shang Yang, Zhekai Zhang, Guangxuan Xiao, Chuang Gan, and Song  
599 Han. Qserve: W4a8kv4 quantization and system co-design for efficient llm serving. *arXiv  
600 preprint arXiv:2405.04532*, 2024b.
- 601 Zechun Liu, Changsheng Zhao, Igor Fedorov, Bilge Soran, Dhruv Choudhary, Raghuraman Krish-  
602 namoorthi, Vikas Chandra, Yuandong Tian, and Tijmen Blankevoort. Spinqant–llm quantization  
603 with learned rotations. *arXiv preprint arXiv:2405.16406*, 2024.
- 604 J Macqueen. *Some methods for classification and analysis of multivariate observations*. University  
605 of California Press, 1967.
- 606 Stephen Merity, Caoming Xiong, James Bradbury, and Richard Socher. Pointer sentinel mixture  
607 models, 2016.
- 608 Yuhong Mo, Hao Qin, Yushan Dong, Ziyi Zhu, and Zhenglin Li. Large language model (llm)  
609 ai text generation detection based on transformer deep learning algorithm. *arXiv preprint  
610 arXiv:2405.06652*, 2024.
- 611 Stanley A Mulaik. *Foundations of factor analysis*. CRC press, 2009.
- 612 Markus Nagel, Mart van Baalen, Tijmen Blankevoort, and Max Welling. Data-free quantization  
613 through weight equalization and bias correction. In *Proceedings of the IEEE/CVF International  
614 Conference on Computer Vision*, pp. 1325–1334, 2019.
- 615 Alec Radford, Jeffrey Wu, Rewon Child, David Luan, Dario Amodei, Ilya Sutskever, et al. Language  
616 models are unsupervised multitask learners. *OpenAI blog*, 1(8):9, 2019.
- 617 Keisuke Sakaguchi, Ronan Le Bras, Chandra Bhagavatula, and Yejin Choi. Winogrande: An adver-  
618 sarial winograd schema challenge at scale. *Communications of the ACM*, 64(9):99–106, 2021.
- 619 Wenqi Shao, Mengzhao Chen, Zhaoyang Zhang, Peng Xu, Lirui Zhao, Zhiqian Li, Kaipeng Zhang,  
620 Peng Gao, Yu Qiao, and Ping Luo. Omniquant: Omnidirectionally calibrated quantization for  
621 large language models. *arXiv preprint arXiv:2308.13137*, 2023.
- 622 Mingjie Sun, Xinlei Chen, J Zico Kolter, and Zhuang Liu. Massive activations in large language  
623 models. *arXiv preprint arXiv:2402.17762*, 2024.
- 624 Gemini Team, Rohan Anil, Sebastian Borgeaud, Yonghui Wu, Jean-Baptiste Alayrac, Jiahui Yu,  
625 Radu Soricut, Johan Schalkwyk, Andrew M Dai, Anja Hauth, et al. Gemini: a family of highly  
626 capable multimodal models. *arXiv preprint arXiv:2312.11805*, 2023.
- 627 Hugo Touvron, Louis Martin, Kevin Stone, Peter Albert, Amjad Almahairi, Yasmine Babaei, Niko-  
628 lay Bashlykov, Soumya Batra, Prajjwal Bhargava, Shruti Bhosale, et al. Llama 2: Open founda-  
629 tion and fine-tuned chat models. *arXiv preprint arXiv:2307.09288*, 2023.
- 630 Albert Tseng, Jerry Chee, Qingyao Sun, Volodymyr Kuleshov, and Christopher De Sa. Quip#:  
631 Even better llm quantization with hadamard incoherence and lattice codebooks. *arXiv preprint  
632 arXiv:2402.04396*, 2024.
- 633 Xiuying Wei, Yunchen Zhang, Yuhang Li, Xiangguo Zhang, Ruihao Gong, Jinyang Guo, and Xian-  
634 glong Liu. Outlier suppression+: Accurate quantization of large language models by equivalent  
635 and optimal shifting and scaling. *arXiv preprint arXiv:2304.09145*, 2023.
- 636 Likang Wu, Zhi Zheng, Zhaopeng Qiu, Hao Wang, Hongchao Gu, Tingjia Shen, Chuan Qin, Chen  
637 Zhu, Hengshu Zhu, Qi Liu, Hui Xiong, and Enhong Chen. A survey on large language models  
638 for recommendation. *CoRR*, abs/2305.19860, 2023.
- 639 Guangxuan Xiao, Ji Lin, Mickael Seznec, Hao Wu, Julien Demouth, and Song Han. Smoothquant:  
640 Accurate and efficient post-training quantization for large language models. In *International  
641 Conference on Machine Learning*, pp. 38087–38099. PMLR, 2023.



648 Zhewei Yao, Reza Yazdani Aminabadi, Minjia Zhang, Xiaoxia Wu, Conglong Li, and Yuxiong  
649 He. Zeroquant: Efficient and affordable post-training quantization for large-scale transformers.  
650 *Advances in Neural Information Processing Systems*, 35:27168–27183, 2022.  
651

652 Rowan Zellers, Ari Holtzman, Yonatan Bisk, Ali Farhadi, and Yejin Choi. Hellaswag: Can a ma-  
653 chine really finish your sentence? *arXiv preprint arXiv:1905.07830*, 2019.

654 Aohan Zeng, Xiao Liu, Zhengxiao Du, Zihan Wang, Hanyu Lai, Ming Ding, Zhuoyi Yang, Yifan Xu,  
655 Wendi Zheng, Xiao Xia, et al. Glm-130b: An open bilingual pre-trained model. *arXiv preprint*  
656 *arXiv:2210.02414*, 2022.  
657

658 Biao Zhang, Barry Haddow, and Alexandra Birch. Prompting large language model for machine  
659 translation: A case study. In *International Conference on Machine Learning*, pp. 41092–41110.  
660 PMLR, 2023.

661 Ying Zhang, Peng Zhang, Mincong Huang, Jingyang Xiang, Yujie Wang, Chao Wang, Yineng  
662 Zhang, Lei Yu, Chuan Liu, and Wei Lin. Qqq: Quality quattuor-bit quantization for large language  
663 models. *arXiv preprint arXiv:2406.09904*, 2024.  
664  
665  
666  
667  
668  
669  
670  
671  
672  
673  
674  
675  
676  
677  
678  
679  
680  
681  
682  
683  
684  
685  
686  
687  
688  
689  
690  
691  
692  
693  
694  
695  
696  
697  
698  
699  
700  
701

A QUANTIZATION ERROR FOR TOKENS WITH MASSIVE ACTIVATION IN LLaMA2-7B, LLaMA2-13B AND MISTRAL-7B-v0.3

More quantization results for LLaMA2-7B, LLaMA2-13B and Mistral-7B-v0.3:

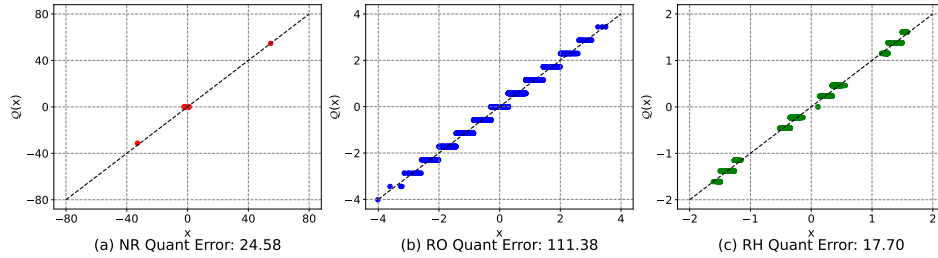

Figure 11: Comparison of 2D 4-bit quantization errors for tokens with NR, RO and RH for LLaMA2-7B from Figure 2.

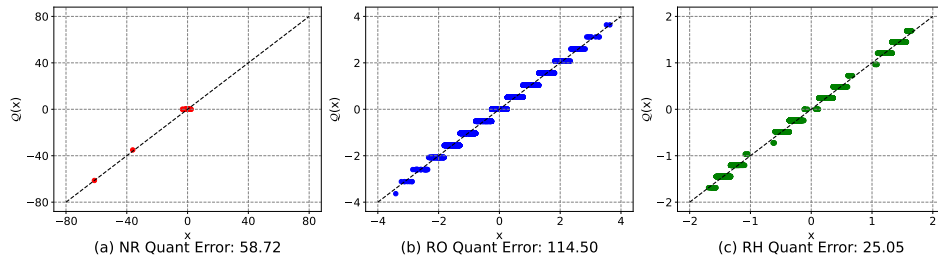

Figure 12: Comparison of 2D 4-bit quantization errors for tokens with NR, RO and RH for Mistral-7B-v0.3 from Figure 2.

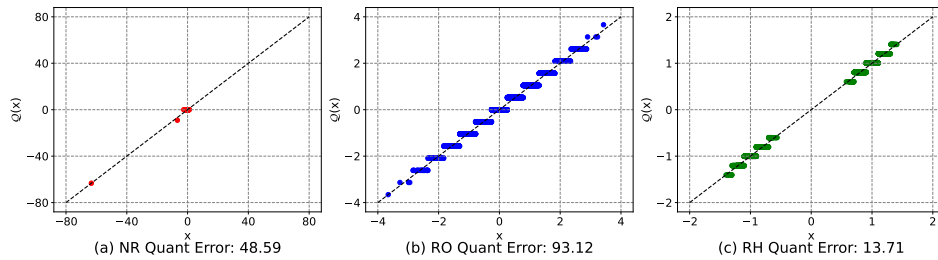

Figure 13: Comparison of 2D 4-bit quantization errors for tokens with NR, RO and RH for Mistral-7B-v0.3 from Figure 2.

## B QUANTIZATION ERROR BETWEEN VANILLA, RANDOM AND HADAMARD

More 2D quantization error visualization are shown as follows:

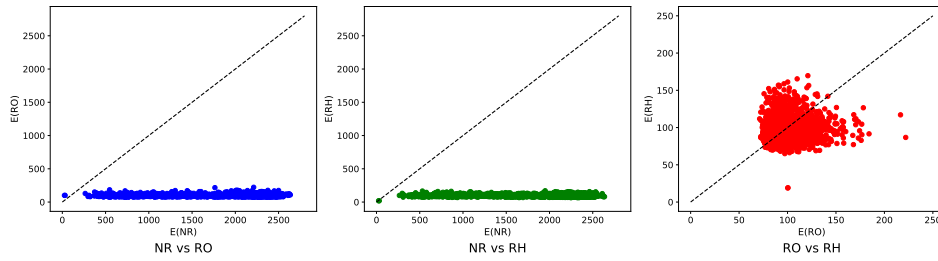

Figure 14: Comparison of 4-bit quantization error for the token with massive activation with NR, RO and RH for LLaMA2-7B from Figure 2.

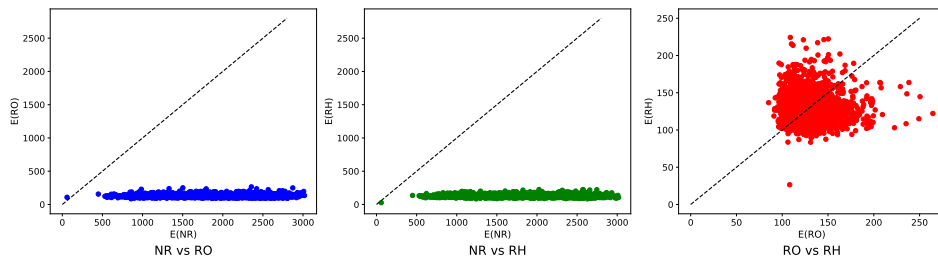

Figure 15: Comparison of 4-bit quantization error for the token with massive activation with NR, RO and RH for LLaMA2-13B from Figure 2.

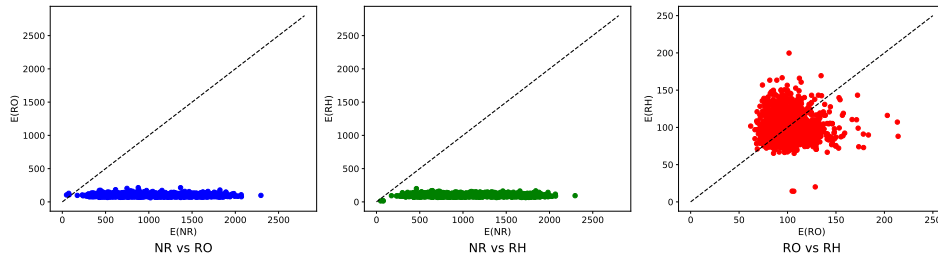

Figure 16: Comparison of 4-bit quantization error for the token with massive activation with NR, RO and RH for Mistral-7B-v0.3 from Figure 2.

Table 4: WikiText-2 perplexity ( $\downarrow$ ) results for LLaMA2-7B. The 4-4-4 and 4-4-16 represent W4A4KV4, W4A4KV16, respectively. We show the failed GPTQ experiments using NaN and the perplexity results  $>100$  by Inf.

| Method        | LLaMA2-7B |        | Method         | LLaMA2-7B |        |
|---------------|-----------|--------|----------------|-----------|--------|
| Baseline      | 5.47      |        | Baseline       | 5.47      |        |
|               | 4-4-4     | 4-4-16 |                | 4-4-4     | 4-4-16 |
| RTN           | NaN       | NaN    | GPTQ           | NaN       | NaN    |
| QuaRot-RTN    | 9.04      | 8.69   | QuaRot-GPTQ    | 6.27      | 6.20   |
| SpinQuant-RTN | 6.20      | 6.17   | SpinQuant-GPTQ | 5.94      | 5.91   |
| OFMAF-RTN     | 7.68      | 7.47   | OFMAF-GPTQ     | 6.21      | 6.14   |

Table 5: Zero-shot accuracy ( $\uparrow$ ) of LLaMA2-7B with GPTQ on PIQA (PQ), WinoGrande (WG), HellaSwag (HS), Arc-Easy (A-e), Arc-Challenge (A-c), and LAMBADA (LA).

| Model     | Method    | W-A-KV   | PQ    | WG    | HS    | A-e   | A-c   | LA    | Avg.  |
|-----------|-----------|----------|-------|-------|-------|-------|-------|-------|-------|
| LLaMA2-7B | FP16      | 16-16-16 | 79.11 | 68.98 | 75.99 | 74.54 | 46.42 | 73.88 | 69.82 |
|           | QuaRot    | 4-4-16   | 76.06 | 65.67 | 73.00 | 69.82 | 42.24 | 69.42 | 66.03 |
|           |           | 4-4-4    | 76.33 | 64.96 | 72.69 | 68.60 | 41.64 | 68.58 | 65.47 |
|           | SpinQuant | 4-4-16   | 75.24 | 66.14 | 72.82 | 68.77 | 40.44 | 70.88 | 65.72 |
|           |           | 4-4-4    | 76.66 | 65.98 | 72.78 | 70.92 | 42.06 | 70.12 | 66.42 |
|           | DFRot     | 4-4-16   | 77.15 | 65.82 | 73.17 | 69.78 | 44.37 | 70.66 | 66.83 |
|           |           | 4-4-4    | 76.22 | 64.96 | 72.41 | 70.75 | 42.66 | 69.92 | 66.15 |

## C COMPARE TO SPINQUANT

Here, we present a detailed comparison between DFRot and SpinQuant (Liu et al., 2024):

- Motivation.** The motivations behind SpinQuant and DFRot are entirely different. SpinQuant maintains the orthogonality of matrices throughout the training process using Cayley Optimization (Li et al., 2020), representing an end-to-end approach. In contrast, DFRot finds the fundamental reasons for performance differences in RO and RH is the quantization errors of tokens with massive activation. Recognizing the rarity of such tokens, it considers this a long-tail optimization problem and introduces a weighted loss function.
- Optimization Methods.** SpinQuant optimizes rotation matrices using Cayley optimization, which necessitates loading the entire model and completing both forward and backward to obtain gradients during the training process. In contrast, DFRot regards the optimization of rotation matrices and quantization parameters as an implementation of an Expectation-Maximization (EM) like algorithm, employing Procrustes transformation to solve it, requiring only a single forward.
- Optimization Cost.** To load and train the LLM, an NVIDIA A100 GPU with 80GB is almost essential for SpinQuant. In contrast, DFRot has lower hardware requirements than SpinQuant and can even optimize on RTX4090 24GB. For the training time, as mentioned by SpinQuant, it takes  $\sim 1.39$  hours for LLaMA-3 8B,  $\sim 1.25$  hours for the LLaMA-2 7B,  $\sim 2.36$  hours for LLaMA-2 13B on 8 NVIDIA A100 GPUs. However, our DFRot only take  $\sim 8$  minutes for the LLaMA2-7B,  $\sim 20$  minutes for the LLaMA-2 7B,  $\sim 8$  minutes for LLaMA-2 13B on 1 NVIDIA A100 GPU. Therefore, DFRot is more efficient.
- Performance.** Benefit from fine-tuning rotation matrices across the entire network through gradients, SpinQuant outperforms DFRot on the WikiText-2 PPL, as shown in Table 4, particularly in RTN quantization. However, we find for zero-shot tasks, DFRot still performs on par with SpinQuant as seen in Table 5. This indicates that the model’s zero-shot capability does not have a direct correlation with its performance on the calibration dataset. By implementing *Outlier-Free* and *Massive Activation-Free*, DFRot also effectively enhances the performance of quantized LLMs. On the other hand, the goal of DFRot is not to achieve state-of-the-art performance. In contrast, it aims to highlight the significant importance of tokens with massive activation and explains the fundamental reasons why RH performance better than RO. Based on this finding, we propose an efficient and feasible solution to address the problem.

**Algorithm 1** Optimization of Quantization Parameters and Rotation Matrix

---

**Require:** Token  $x$ , initial rotation matrix  $R_1$ , quantization function  $Q$   
**Ensure:** Optimized rotation matrix  $R_1$  and quantization parameters  $\eta_x$

- 1: Initialize  $R_1$  with randomized Hadamard matrix,  $t = 0$
- 2: **while** not converged **do**
- 3:   // Step 1: Optimize Quantization Parameters  $\eta_x$
- 4:   **for** each token  $x$  **do**
- 5:     Compute quantization parameters  $s, z$  via  $\arg \min_{s,z} \|xR_1^{t-1} - Q(xR_1^{t-1}, s, z)\|_2^2$
- 6:     Update  $\eta_x^t = Q(xR_1^{t-1}, s^t, z^t)$
- 7:   **end for**
- 8:   // Step 2: Optimize Rotation Matrix  $R_1$
- 9:   Solve the Procrustes problem to update  $R_1^t$ :  $R_1^t = \arg \min_R \|XR - \eta_X^t\|_F^2$
- 10:    $t = t + 1$
- 11: **end while**
- 12: **return** Optimized  $R_1^*$

---

## D CALIBRATION DATA

In this section, we explain the reason why we only used a single data sample to calibrate the rotation matrix  $R_1$  in DFRot, and don not attempt to use more data:

- In LLMs, outliers and massive activations often appear in some fixed channels. Therefore, the process of optimizing the rotation matrix can be seen as an optimization of the distribution patterns of outliers and massive activations. We have simply use ten samples to calibrate the rotation matrix for LLaMA2-7B, but no significant improvement in accuracy was observed.
- Our calibration data is a sample with a length of 2048 tokens. Since we obtain the calibration set from each MHA and FFN, taking LLaMA2-7B as an example, we can obtain  $2048 \times 32 \times 2 = 131072$  tokens as calibration tokens. This is relatively sufficient to statistically analyze the distribution patterns of outliers and massive activations.

## E ALGORITHM

## F RESULTS FOR QWEN2-7B

To further investigate the significance of massive activation on the final performance of the model, we conducted experiments using the recently renowned open-source model QWen2-7B. We find that the QWen2-7B model exhibits several different properties compared to LLaMA2-7B, LLaMA2-13B, LLaMA3-8B, and Mistral-7B-v0.3:

**Language Generation Task and Zero-Shot tasks.** Compared Table 1 to Table 6, when we used QuaRot.FP16() to retain the tokens with massive activation in FP16, although both of the performance of the RO and RH improved, the performance of RH still surpassed that of RO, which is inconsistent with the results in Table 1. For language generation task, similar to Mistral-7B-v0.3, DFRot does not achieve PPL improvement for QWen2-7B as shown in Table 7. However, from Table 8, we find it still improves accuracy for zero-shot tasks, which demonstrates the effectiveness of DFRot again.

**Quantization error and performance improvement.** We visualize the quantization error for QWen2-7B. As shown in Figure 17 and Figure 19, compared to previous models, QWen2-7B exhibits massive activation across multiple dimensions, which leads to a larger quantization error for the previous model. Based on this, both RO and RH effectively reduce the quantization error for tokens with massive activation, *e.g.* there is no red point in Figure 17 for QWen2-7B. This also explains why the PPL improvement of RO after using QuaRot.FP16() is not as pronounced as in previous models. Additionally, by comparing the quantization error between RO and RH in Figure 18, we observe that for QWen2-7B, the quantization error of RH slightly outperforms that of RO. Therefore, the performance of (RH) QuaRot.FP16() still surpasses that of (RO) QuaRot.FP16() .

**Quantize KV-Cache to 4-bit.** We find QWen2-7B is highly sensitive to the quantization of KV-Cache. When KV-Cache is quantized to 4 bits, the model performance completely collapses, even with W4A8KV4, which is significantly different from previous models. We find that this is due to QWen2-7B employs bias for Q, K, V module and some biases is large. This can lead to significant outliers for some specific channels and result in severe quantization errors for the KV-Cache quantization, even with rotation. Exploring how to better integrate rotation matrices with smooth methods for the quantization of KV-Cache is also an important research direction.

Table 6: WikiText-2 perplexity ( $\downarrow$ ) results for RO and RH for QWen2-7B. The 4-4-4, 4-4-16, 4-8-16 represent W4A4KV4, W4A4KV16, W4A8KV16 respectively. We show the perplexity results  $>100$  by Inf. QuaRot.FP16() denotes retaining tokens with massive activations as FP16.

| Method             | QWen2-7B |       |        |        |
|--------------------|----------|-------|--------|--------|
|                    | 4-4-4    | 4-4-8 | 4-4-16 | 4-8-16 |
| GPTQ               | Inf      | Inf   | Inf    | 7.57   |
| (RO) QuaRot        | Inf      | 8.07  | 8.07   | 7.25   |
| (RO) QuaRot.FP16() | Inf      | 7.98  | 7.97   | -      |
| (RH) QuaRot        | Inf      | 7.95  | 7.95   | 7.24   |
| (RH) QuaRot.FP16() | Inf      | 7.91  | 7.91   | -      |

Table 7: WikiText-2 perplexity ( $\downarrow$ ) results for QWen2-7B. The 4-4-4, 4-4-8, 4-4-16 represent W4A4KV4, W4A4KV8, W4A4KV16 respectively. We show the perplexity results  $>100$  by Inf.

| Method     | QWen2-7B |       |        | Method      | QWen2-7B |       |        |
|------------|----------|-------|--------|-------------|----------|-------|--------|
| Baseline   | 7.14     |       |        | Baseline    | 7.14     |       |        |
| Extra Time | +6min    |       |        | Extra Time  | +6min    |       |        |
|            | 4-4-4    | 4-4-8 | 4-4-16 |             | 4-4-4    | 4-4-8 | 4-4-16 |
| RTN        | Inf      | Inf   | Inf    | GPTQ        | Inf      | Inf   | Inf    |
| QuaRot-RTN | Inf      | 8.41  | 8.41   | QuaRot-GPTQ | Inf      | 7.95  | 7.95   |
| DFRot-RTN  | Inf      | 8.40  | 8.43   | DFRot-GPTQ  | Inf      | 7.96  | 7.94   |

Table 8: Zero-shot accuracy ( $\uparrow$ ) of QWen2-7B with GPTQ on PIQA (PQ), WinoGrande (WG), HellaSwag (HS), Arc-Easy (A-e), Arc-Challenge (A-c), and LAMBADA (LA).

| Model    | Method | W-A-KV   | PQ    | WG    | HS    | A-e   | A-c   | LA    | Avg.  |
|----------|--------|----------|-------|-------|-------|-------|-------|-------|-------|
| QWen2-7B | FP16   | 16-16-16 | 81.07 | 72.45 | 78.83 | 74.66 | 49.83 | 71.82 | 71.44 |
|          | QuaRot | 4-4-16   | 78.02 | 68.11 | 75.16 | 72.22 | 45.56 | 66.83 | 67.65 |
|          |        | 4-4-8    | 78.02 | 66.38 | 75.24 | 71.34 | 46.76 | 67.13 | 67.48 |
|          |        | 4-4-4    | 57.18 | 49.09 | 28.56 | 31.99 | 25.94 | 0.45  | 32.20 |
|          | DFRot  | 4-4-16   | 78.73 | 69.30 | 75.59 | 74.12 | 49.40 | 67.63 | 69.13 |
|          |        | 4-4-8    | 78.51 | 66.93 | 75.06 | 72.18 | 49.06 | 66.85 | 68.10 |
|          |        | 4-4-4    | 55.88 | 49.17 | 27.79 | 34.34 | 25.60 | 0.50  | 32.21 |

972  
973  
974  
975  
976  
977  
978  
979  
980  
981  
982  
983  
984  
985  
986  
987  
988  
989  
990  
991  
992  
993  
994  
995  
996  
997  
998  
999  
1000  
1001  
1002  
1003  
1004  
1005  
1006  
1007  
1008  
1009  
1010  
1011  
1012  
1013  
1014  
1015  
1016  
1017  
1018  
1019  
1020  
1021  
1022  
1023  
1024  
1025

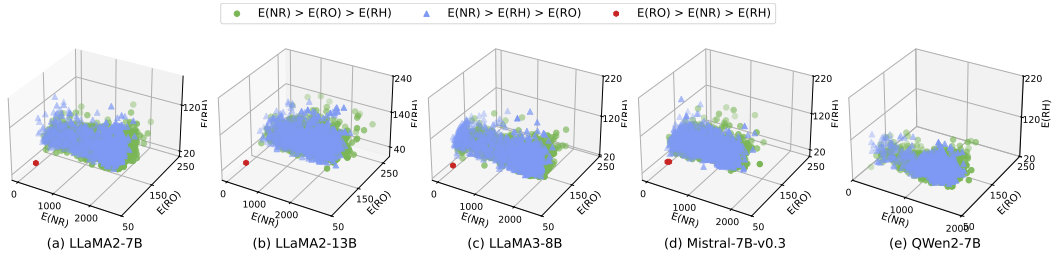

Figure 17: Comparison of 4-bit activation quantization error  $E(\cdot)$  for each token with NR, RO and RH for (a) LLaMA2-7B, (b) LLaMA2-13B, (c) LLaMA3-8B and (d) Mistral-7B-v0.3, (e) QWen2-7B. The tokens are from model.layers.6.post\_attention\_layernorm. Best viewed in color.

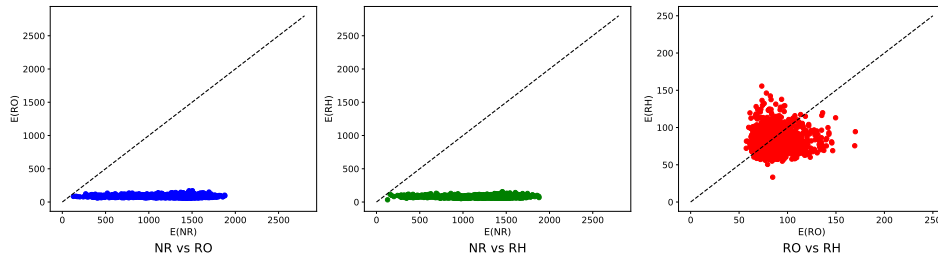

Figure 18: Comparison of 2D 4-bit quantization errors for tokens with NR, RO and RH for QWen2-7B.

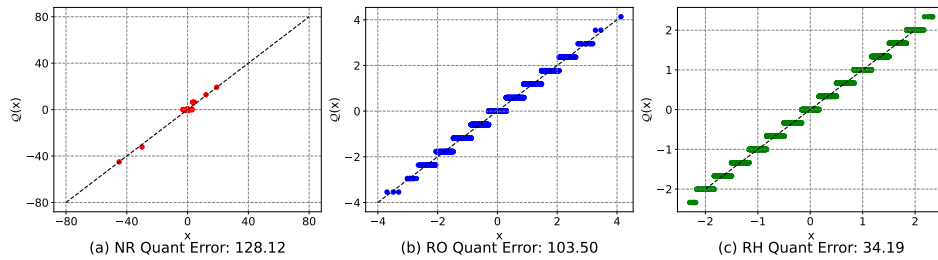

Figure 19: Comparison of 4-bit quantization error for token with massive activation without rotation (Vanilla), with RO and RH for QWen2-7B.

## G VISUALIZATION FOR DIFFERENT LAYERS

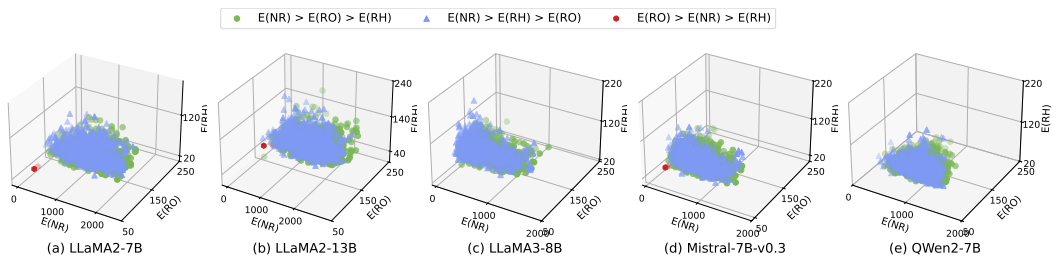

Figure 20: The tokens are from model.layers.2.input\_layernorm

1026  
 1027  
 1028  
 1029  
 1030  
 1031  
 1032  
 1033  
 1034  
 1035  
 1036  
 1037  
 1038  
 1039  
 1040  
 1041  
 1042  
 1043  
 1044  
 1045  
 1046  
 1047  
 1048  
 1049  
 1050  
 1051  
 1052  
 1053  
 1054  
 1055  
 1056  
 1057  
 1058  
 1059  
 1060  
 1061  
 1062  
 1063  
 1064  
 1065  
 1066  
 1067  
 1068  
 1069  
 1070  
 1071  
 1072  
 1073  
 1074  
 1075  
 1076  
 1077  
 1078  
 1079

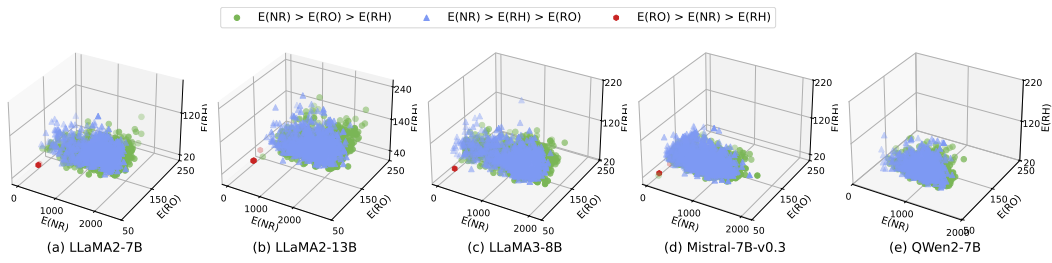

Figure 21: The tokens are from model.layers.2.post\_attention\_layernorm

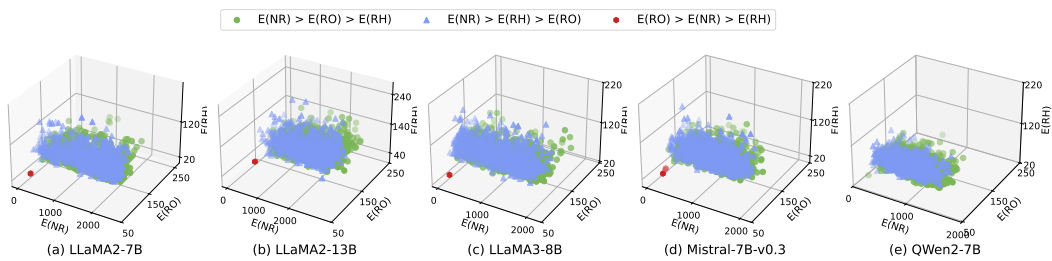

Figure 22: The tokens are from model.layers.5.input\_layernorm

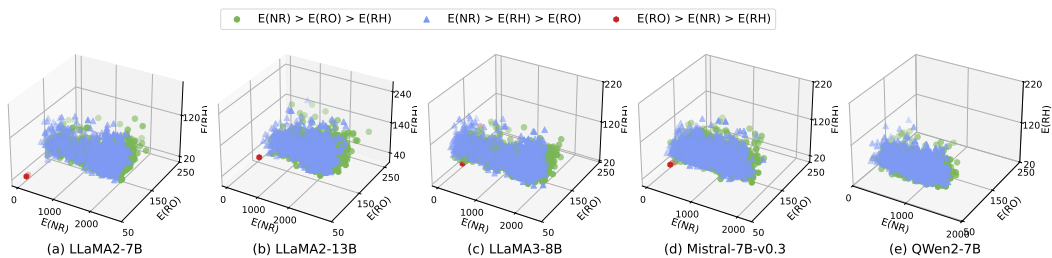

Figure 23: The tokens are from model.layers.5.post\_attention\_layernorm

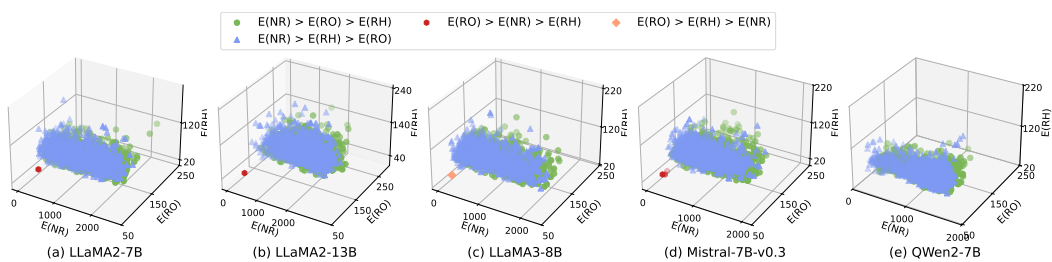

Figure 24: The tokens are from model.layers.7.input\_layernorm



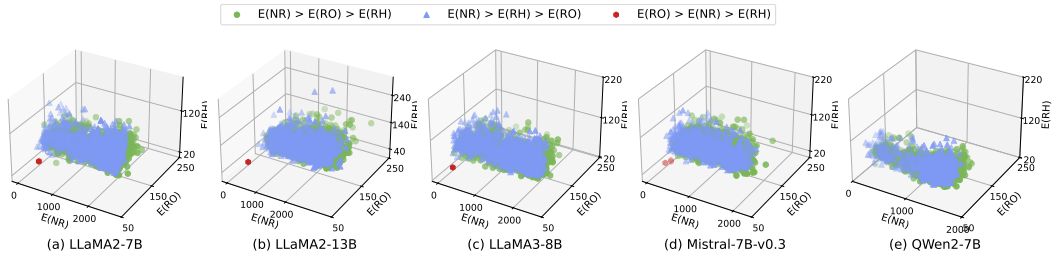

Figure 25: The tokens are from model.layers.7.post\_attention\_layernorm

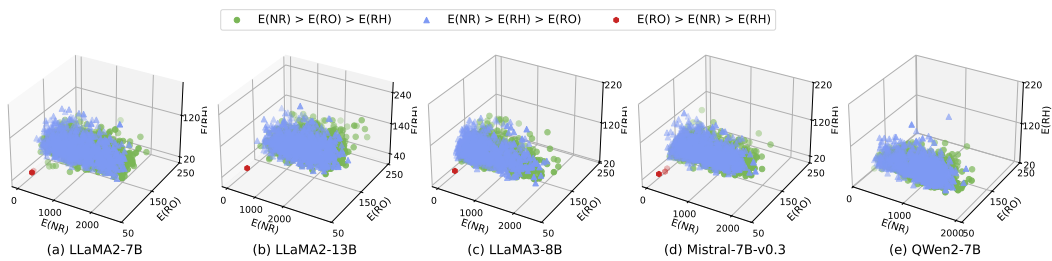

Figure 26: The tokens are from model.layers.9.input\_layernorm

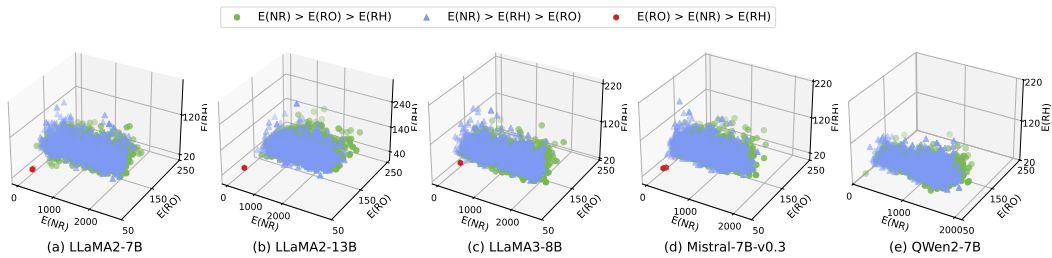

Figure 27: The tokens are from model.layers.9.post\_attention\_layernorm

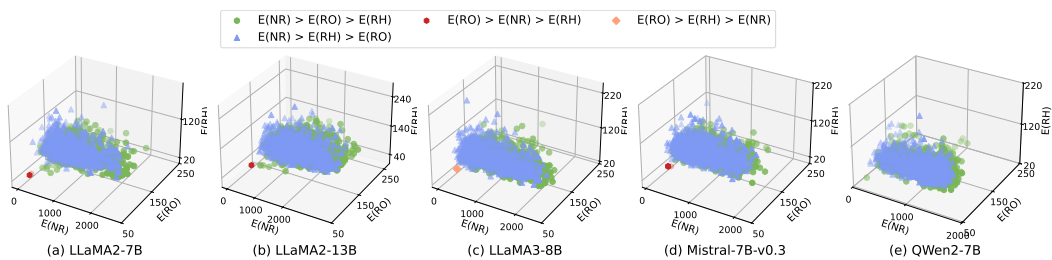

Figure 28: The tokens are from model.layers.11.input\_layernorm

1134  
 1135  
 1136  
 1137  
 1138  
 1139  
 1140  
 1141  
 1142  
 1143  
 1144  
 1145  
 1146  
 1147  
 1148  
 1149  
 1150  
 1151  
 1152  
 1153  
 1154  
 1155  
 1156  
 1157  
 1158  
 1159  
 1160  
 1161  
 1162  
 1163  
 1164  
 1165  
 1166  
 1167  
 1168  
 1169  
 1170  
 1171  
 1172  
 1173  
 1174  
 1175  
 1176  
 1177  
 1178  
 1179  
 1180  
 1181  
 1182  
 1183  
 1184  
 1185  
 1186  
 1187

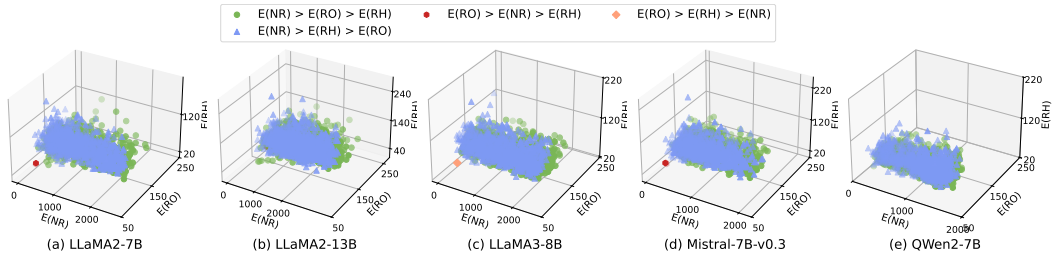

Figure 29: The tokens are from model.layers.11.post\_attention\_layernorm

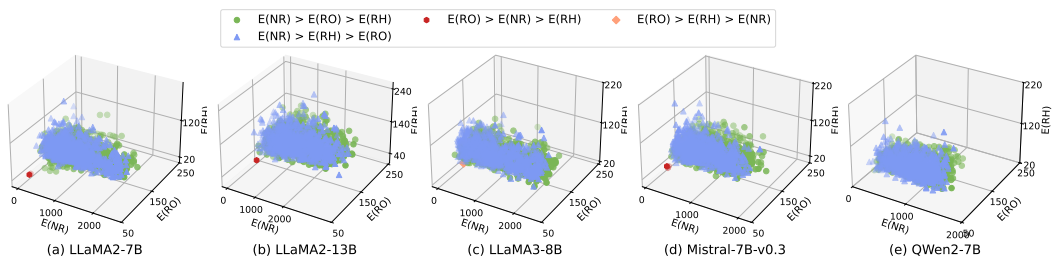

Figure 30: The tokens are from model.layers.13.input\_layernorm

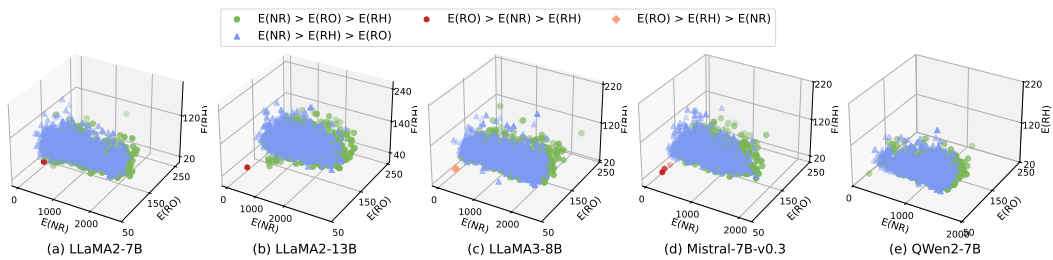

Figure 31: The tokens are from model.layers.13.post\_attention\_layernorm

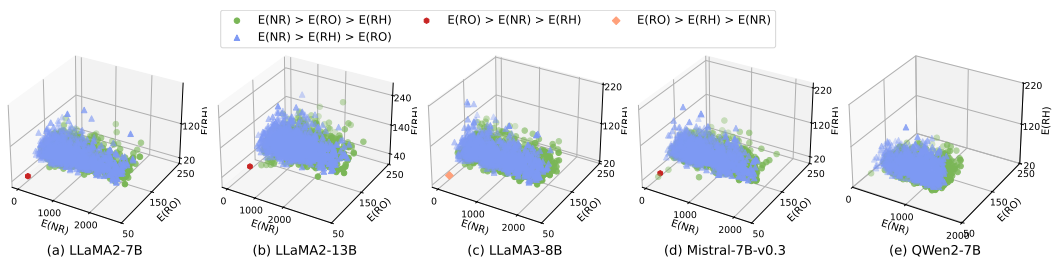

Figure 32: The tokens are from model.layers.15.input\_layernorm

1188  
 1189  
 1190  
 1191  
 1192  
 1193  
 1194  
 1195  
 1196  
 1197  
 1198  
 1199  
 1200  
 1201  
 1202  
 1203  
 1204  
 1205  
 1206  
 1207  
 1208  
 1209  
 1210  
 1211  
 1212  
 1213  
 1214  
 1215  
 1216  
 1217  
 1218  
 1219  
 1220  
 1221  
 1222  
 1223  
 1224  
 1225  
 1226  
 1227  
 1228  
 1229  
 1230  
 1231  
 1232  
 1233  
 1234  
 1235  
 1236  
 1237  
 1238  
 1239  
 1240  
 1241

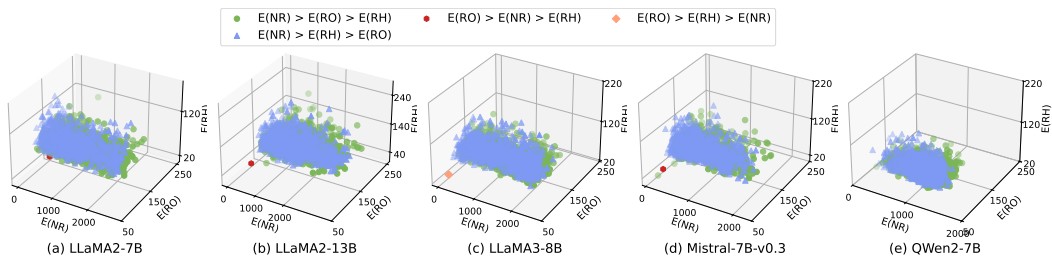

Figure 33: The tokens are from model.layers.15.post\_attention\_layernorm
